# Supplementary material for: Technical note: Determining chemical composition of atmospheric single particles by a standard-free mass calibration algorithm
Source: Copernicus journal article supplement (doi:10.5194/egusphere-2023-2610), 2023-12-04
Supplement: Supplementary file 1 [file egusphere-2023-2610-supplement.pdf]

1 *Supporting information for*

2 **Technical note: Determining chemical**  
3 **composition of atmospheric single particles by a**  
4 **standard-free mass calibration algorithm**

5 **Authors:** Shao Shi<sup>1,2</sup>, Jinghao Zhai<sup>1,2\*</sup>, Xin Yang<sup>1,2\*</sup>, Yechun Ruan<sup>3</sup>, Yuanlong Huang<sup>4</sup>,  
6 Xujian Chen<sup>5</sup>, Antai Zhang<sup>1,2</sup>, Jianhuai Ye<sup>1,2</sup>, Guomao Zheng<sup>1,2</sup>, Baohua Cai<sup>1,2</sup>, Yaling  
7 Zeng<sup>1,2</sup>, Yixiang Wang<sup>1,2</sup>, Chunbo Xing<sup>1,2</sup>, Yujie Zhang<sup>1,2</sup>, Tzung-May Fu<sup>1,2</sup>, Lei Zhu<sup>1,2</sup>,  
8 Huizhong Shen<sup>1,2</sup>, Chen Wang<sup>1,2</sup>

9 *<sup>1</sup>Shenzhen Key Laboratory of Precision Measurement and Early Warning Technology for*  
10 *Urban Environmental Health Risks, School of Environmental Science and Engineering,*  
11 *Southern University of Science and Technology, Shenzhen 518055, China*

12 *<sup>2</sup>Guangdong Provincial Observation and Research Station for Coastal Atmosphere and*  
13 *Climate of the Greater Bay Area, Shenzhen 518055, China*

14 *<sup>3</sup>Institute of Future Networks, Southern University of Science and Technology, Shenzhen*  
15 *518055, China*

16 *<sup>4</sup>College of Engineering, Eastern Institute for Advanced Study, Ningbo, 315200, China*

17 *<sup>5</sup>Department of Mathematics, Southern University of Science and Technology, Shenzhen*  
18 *518055, China*

19 \*To whom correspondence should be addressed.

20 Correspondence to: Jinghao Zhai, Email: zhaijh@sustech.edu.cn

21 Xin Yang, Email: yangx@sustech.edu.cn

22 **Contents**

23 Text S1 ..... 3

24 Text S2 ..... 5

25 Text S3 ..... 7

26 Figure S1 ..... 8

27 Figure S2 ..... 9

28 Figure S3 ..... 10

29 Table S1 ..... 11

30 References ..... 12

31

32 **Text S1. The single particle mass spectrometer used in this study.**

33 This study employed a state-of-the-art single particle aerosol mass spectrometer with high  
34 performance (HP-SPAMS, Hexin Instrument Co., Ltd.) to investigate the chemical  
35 composition of individual particles.(Li et al., 2011; Du et al., 2022) Particles were directed  
36 into an aerodynamic focusing lens and propelled at velocities dictated by their size.(Carson  
37 et al., 1995; Clemen et al., 2020) The vacuum aerodynamic diameter of each particle was  
38 then determined by calculating the time delay detected by two continuous lasers (Nd: YAG,  
39 532 nm) oriented at right angles to each other. Particles are then sequentially ionized by  
40 laser desorption/ionization (LDI) technique. (Du et al., 2022; Peacock et al., 2017) Within  
41 the ion source region, particles triggered a pulsed desorption/ionization laser (Nd: YAG,  
42 266 nm), generating ion fragments. The resulting ions fly under the force of accelerating  
43 potential in a TOF-MS. (Murray et al., 2013) For each particle, both positive and negative  
44 mass spectra were recorded using a bipolar time-of-flight mass spectrometer (Fig. S1). The  
45 raw  $m/z$  are calculated by TOF data with predetermined parameters of the TOF-MS, e.g.,  
46 length of flight path and voltage of the accelerating potential.

47 The initial positions of ions before flight in the TOF-MS are deviated resulting from the  
48 focusing limit of AFL,(Dienes, 2003) leading to shifts in the flight path and the accelerating  
49 potential from the designed parameters (Fig. 1b), and consequently, a drift in the flight time  
50 and the corresponding  $m/z$ .(Wang et al., 2010) Since the deviation is uncertain for each  
51 particle, specific coefficients are required in the calibration function for individual  
52 particles.(Chen et al., 2020; Clemen et al., 2020) Moreover, studies have shown that the  
53 inhomogeneity of ionizing laser could also influence the mass measurement.(Wenzel and  
54 Prather, 2004)

55 The power of the desorption/ionization laser was set to  $\sim 0.6$  mJ/pulse in this study. To  
 56 ensure accurate size determination, the aerodynamic diameter measurements were  
 57 calibrated using monodisperse polystyrene latex spheres (Nanosphere size standards) with  
 58 known diameters ranging from 0.05 to 5.0  $\mu\text{m}$ . To improve data quality, all acquired single  
 59 particle mass spectra were subjected to a filtering process that set a minimum signal  
 60 threshold of 50 mV above the baseline for each  $m/z$  within the range of  $\pm (1-500)$  Th.

61 The relation between  $m/z$  and mass resolution ( $R_m$ ) is described in the empirical equation  
 62 (S1). (Du et al., 2022) The equation is used for the localization of our algorithm.

$$63 \quad R_m = -0.04549(m/z)^2 + 22.98 \frac{m}{z} + 199.6 \quad (\text{S1})$$

64 The  $m/z_r$  was converted from TOF data  $t$  using equation (S2), with coefficients provided  
 65 in the following table, the unit of TOF is ns.

$$66 \quad m/z_r = \left( \frac{t - t_0}{m_0} \right)^2 \quad (\text{S2})$$

| polarity | $t_0$       | $m_0$       |
|----------|-------------|-------------|
| positive | -714.829468 | 1216.546875 |
| negative | -714.993408 | 1209.078735 |

67

68 **Text S2. Detailed description of traits in the prototype.**

69 It is essential to choose traits to establish the prototype to ensure accurate calibration of  
70 mass spectrometer spectra. Prototype is a concept borrowed from statistic machine learning,  
71 but the mechanism of prototype in our algorithm is more like the reward defined in  
72 reinforcement learning.(Hastie et al., 2009)

73 For instance, in the  $S_r$  to be calibrated, if a peak is observed around 51 Th, and the  
74 calibration target is mass deviation less than 0.025 Th, it remains uncertain whether the  
75 exact value is 50.95 Th ( $V^+$ ) or 51.00 Th ( $C_4H_3^+$ ) before calibration (in atmospheric  
76 aerosols,  $V^+$  and  $C_4H_3^+$  are only choices for a reasonable peak around 51 Th). However,  
77 suppose a calibration attempt aligns it to 51.00 Th, and simultaneously, a minor peak at  
78 52.00 Th adheres to the isotopic distribution of  $C_4H_3^+$  (i.e.,  $p(51.00 \text{ Th}): p(52.05 \text{ Th}) = 1:$   
79  $0.43$ ). In that case, this peak is likely corresponding to 51.00 Th ( $C_4H_3^+$ ). Conversely, if it  
80 is calibrated to 50.95 Th and satisfies the monoisotopic characteristic of  $V^+$ , it could be  
81 identified as 50.95 ( $V^+$ ). Additionally, if prominent peaks are both observed around 51 Th  
82 and 67 Th and a series of organic signals (e.g.,  $C_mH_n$  signals) is absent, these peaks may be  
83 identified as  $V^+$  (50.95 Th) and  $VO^+$  (66.95 Th), respectively. The isotopic distributions  
84 thus serve as traits of exact spectra. Any calibration attempt that relocates the peak contrary  
85 to these distributions would be deemed incorrect. Trait matching is considered specific  
86 because a peak matched to more than one trait is in low probability. Although it is easy to  
87 determine whether a trait is not possessed/matched by a spectrum, it is hard to judge  
88 whether a trait is truly possessed (definitely positive) by a spectrum. Once the trait is  
89 matched, it is essential to assess the behavior of  $S_t$  across the entire prototype database  
90 using the value function before confirming a trait is truly positive. Therefore, the traits that  
91 matched are only considered truly positive in  $S_{opt}$ .

92 Consider another example spectrum containing only  $C^+$  (12.00 Th),  $C_2^+$  (24.00 Th),  $C_3^+$   
93 (36.00 Th),  $C_4^+$  (48.00 Th),  $C_5^+$  (60.00 Th), and  $C_4H_3^+$ , and these peaks are collected in the  
94 prototype database. Although this information is unknown before calibration, we can  
95 evaluate any calibration attempt by matching these  $m/z$ . The optimal calibration attempt,  
96  $S_{opt}$ , would align all six peaks to their respective theoretical positions by the prototype,  
97 resulting in peaks at 12.00 Th, 24.00 Th, 36.00 Th, 48.00 Th, 60.00 Th, and 51.00 T. Any  
98  $S_t$  calibrate these peaks to other  $m/z$  position is not the optimal calibration.

99 A special type of traits is isolate ions because the trait matching of this type is certain.  
100 For instance, if we observed the presence of a peak around 12 Th. Given the mass deviation  
101 range ( $\pm 0.1$  Th at 12 Th), the only valid theoretical choice for its value would be 12.00 Th  
102 ( $C^+$ ) in atmospheric aerosol samples. Consequently, any calibration attempt that relocates  
103 this peak to a position other than 12.00 Th is miscalibration. Additionally, if a small peak  
104 is observed around 13 Th, along with a strong peak at 12 Th and following the isotope  
105 distribution of carbon, the assertion is further confirmed.

106

107 **Text S3.** Simplified pseudocode of the algorithm.

---

**Standard-free calibration Algorithm:** calibration core

---

**Input:** The raw mass spectrum *raw*, the prototype database *ptt*, the  $\theta$  space *space*.

**Output:** The optimal calibrated spectrum *opcalied*.

```
1:  maxValue = 0
2:  optCoef = 0
3:  for  $\theta$  in space
4:      S.mz =  $f(\text{raw.mz}, \theta)$ 
5:      thisValue = 0
6:      for  $T_i$  in ptt
7:          thisValue = thisValue +  $T_i.wi * \text{match}(T_i, S)$ 
8:      end for
9:      if thisValue > maxValue then
10:          maxValue = thisValue
11:          optCoef =  $\theta$ 
12:          opcalied = S
13:      end if
14:  end for
15:  return opcalied
```

---

108 The core algorithm of the match function (equation (3)) could be a modification of  
109 binary search, or positive matrix factorization. In this study, the match function adopted a  
110 variation of binary search with a complexity of  $O(n \log n)$  to the number of peaks in the  
111 mass spectrum. Tolerance of mass difference was set to the resolving ability for the fuzzy  
112 matching of  $m/z$ . In addition,  $f(\text{raw}, \theta)$  is the mass calibration function mentioned in  
113 equation (1), and *value* is the function in equation (2).

114

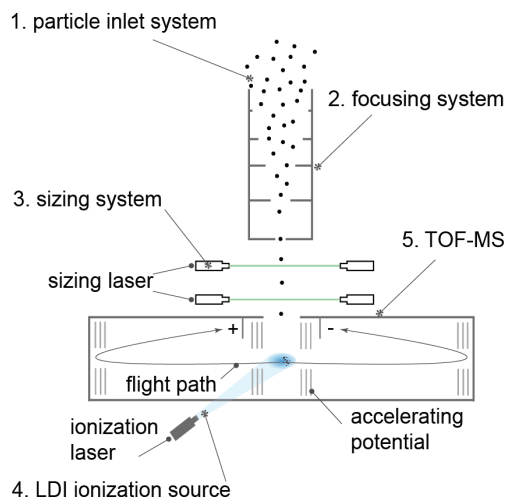

115

116 **Figure S1.** Simplified operational mechanism of the HP-SPAMS. Particle sequentially  
 117 goes through stage 1-5 to generate a raw TOF spectrum.

118



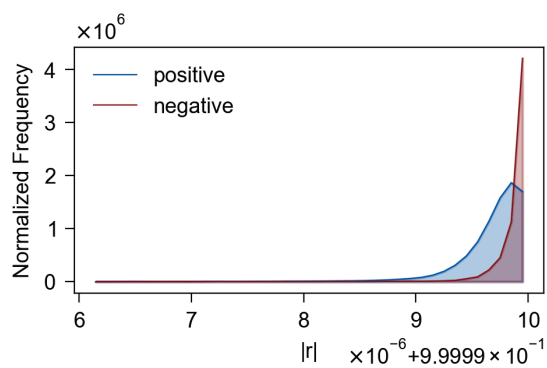

119

120 **Figure S2.** Histogram of  $|r|$  for positive and negative spectra. The histogram of  $|r|$  values  
 121 for positive and negative spectra demonstrates that all the calibrations result in  $|r|$  values  
 122 greater than 0.999996. Shaded areas are summed to 1.

123

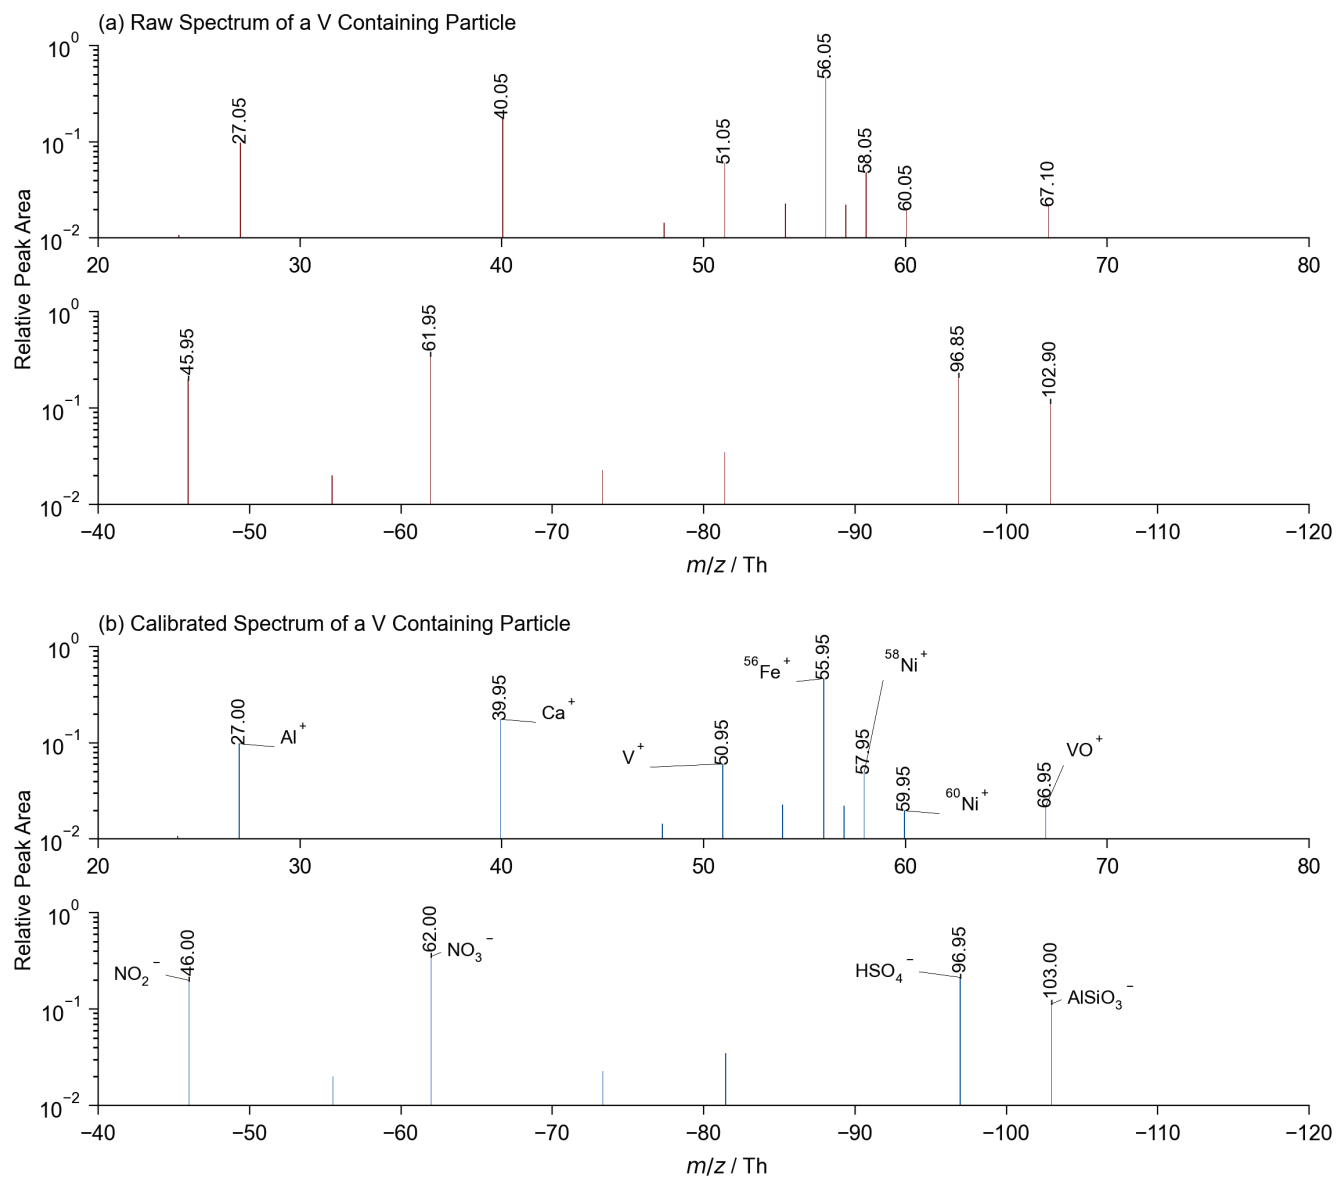

124 **Figure S3.** Example of raw (a) and calibrated (b) single-particle mass spectra of a typical  
 125 vanadium (V) containing particle.

126

**Table S1.** Accuracy and resolution required for separating easily confused ions typically encountered in aerosol research (50% separation).

| Ion pair                                                      | Isotopic $m/z$ (Th) | $\Delta m/z$ (Th) | Accuracy (ppm) | Resolution (FWHM) |
|---------------------------------------------------------------|---------------------|-------------------|----------------|-------------------|
| Mg <sup>+</sup> /C <sub>2</sub> <sup>+</sup>                  | 23.9845/23.9995     | 0.0150            | 625.0          | 2400              |
| Al <sup>+</sup> /C <sub>2</sub> H <sub>3</sub> <sup>+</sup>   | 26.9810/27.0229     | 0.0419            | 1551           | 967.5             |
| Ca <sup>+</sup> /NaOH <sup>+</sup>                            | 39.9620/39.9920     | 0.0300            | 750.7          | 1998              |
| K <sup>+</sup> /C <sub>2</sub> NH <sup>+</sup>                | 38.9631/39.0104     | 0.0473            | 1212           | 1237              |
| Ti <sup>+</sup> /C <sub>4</sub> <sup>+</sup>                  | 47.9474/ 47.9995    | 0.0521            | 1085           | 1382              |
| V <sup>+</sup> /C <sub>4</sub> H <sub>3</sub> <sup>+</sup>    | 50.9434/ 51.0229    | 0.0795            | 1558           | 962.7             |
| Mn <sup>+</sup> /C <sub>3</sub> H <sub>3</sub> O <sup>+</sup> | 54.9375/55.0178     | 0.0803            | 1460           | 1028              |
| Cu <sup>+</sup> /C <sub>5</sub> H <sub>3</sub> <sup>+</sup>   | 62.9290/63.0229     | 0.0939            | 1490           | 1007              |
| Sn <sup>+</sup> /C <sub>10</sub> <sup>+</sup>                 | 119.9016/119.9995   | 0.0979            | 815.8          | 1838              |
| SO <sup>-</sup> /C <sub>4</sub> <sup>-</sup>                  | 47.9675/48.0005     | 0.0330            | 687.5          | 2183              |
| Br <sup>-</sup> /PO <sub>3</sub> <sup>-</sup>                 | 78.9189/78.9591     | 0.0402            | 509.1          | 2946              |

## References

- Carson, P. G., Neubauer, K. R., Johnston, M. V., and Wexler, A. S.: On-line chemical analysis of aerosols by rapid single-particle mass spectrometry, *J. Aerosol Sci.*, 26, 535-545, [https://doi.org/10.1016/0021-8502\(94\)00133-J](https://doi.org/10.1016/0021-8502(94)00133-J), 1995.
- Chen, Y., Kozlovskiy, V., Du, X., Lv, J., Nikiforov, S., Yu, J., Kolosov, A., Gao, W., Zhou, Z., Huang, Z., and Li, L.: Increase of the particle hit rate in a laser single-particle mass spectrometer by pulse delayed extraction technology, *Atmos. Meas. Tech.*, 13, 941-949, <https://doi.org/10.5194/amt-13-941-2020>, 2020.
- Clemen, H.-C., Schneider, J., Klimach, T., Helleis, F., Köllner, F., Hünig, A., Rubach, F., Mertes, S., Wex, H., Stratmann, F., Welti, A., Kohl, R., Frank, F., and Borrmann, S.: Optimizing the detection, ablation, and ion extraction efficiency of a single-particle laser ablation mass spectrometer for application in environments with low aerosol particle concentrations, *Atmos. Meas. Tech.*, 13, 5923-5953, <https://doi.org/10.5194/amt-13-5923-2020>, 2020.
- Dienes, T.: Development, characterization, and refinement of a transportable aerosol time-of-flight mass spectrometer, University of California, Riverside, 2003.
- Du, X., Xie, Q., Huang, Q., Li, X., Yang, J., Hou, Z., Wang, J., Li, X., Zhou, Z., Huang, Z., Gao, W., and Li, L.: The design and characterization of a High-Performance Single-Particle Aerosol Mass Spectrometer (HP-SPAMS), *EGUsphere* [preprint], 2022, 1-23, <https://doi.org/10.5194/egusphere-2022-872>, 2022.
- Hastie, T., Tibshirani, R., Friedman, J. H., and Friedman, J. H.: *The elements of statistical learning: data mining, inference, and prediction*; Springer, 2009.
- Li, L., Huang, Z., Dong, J., Li, M., Gao, W., Nian, H., Fu, Z., Zhang, G., Bi, X., Cheng, P., and Zhou, Z.: Real time bipolar time-of-flight mass spectrometer for analyzing single aerosol particles, *Int. J. Mass Spectrom.*, 303, 118-124, <https://doi.org/10.1016/j.ijms.2011.01.017>, 2011.
- Murray, K. K., Boyd, R. K., Eberlin, M. N., Langley, G. J., Li, L., and Naito, Y.: Definitions of terms relating to mass spectrometry (IUPAC Recommendations 2013), *Pure Appl. Chem.*, 85, 1515-1609, <https://doi.org/10.1351/pac-rec-06-04-06>, 2013.
- Peacock, P. M., Zhang, W. J., and Trimpin, S.: Advances in ionization for mass spectrometry, *Anal. Chem.*, 89, 372-388, <https://doi.org/10.1021/acs.analchem.6b04348>, 2017.
- Wenzel, R. J. and Prather, K. A.: Improvements in ion signal reproducibility obtained using a homogeneous laser beam for on-line laser desorption/ionization of single particles, *Rapid Commun. Mass Spectrom.*, 18, 1525-1533, <https://doi.org/10.1002/rcm.1509>, 2004.
- Wang, X., Chen, H., Yang, F., and Yang, X.: A new algorithm to correct the particle-to-particle shift in single-particle mass spectrometry analysis, *J. Chinese Mass Spectrom. Soc.*, 31, 179, 2010.
