# Supplementary material for: Technical note: Determining chemical composition of atmospheric single particles by a standard-free mass calibration algorithm
Source: Copernicus journal article supplement (doi:10.5194/egusphere-2023-2610), 2023-12-04
Supplement: Supplementary file [file egusphere-2023-2610-AC3-supplement.pdf]

## Response to Editor

We sincerely thank the valuable comments and suggestions from the editor, and have extensively revised our manuscript accordingly. Here, we provide the point-by-point replies.

### Editor

Thanks for answering the comments from both reviewers. After reviewing all the comments, replies and the revised manuscript, though I appreciate the fairly novel method by the authors to improve the accuracy of  $m/z$  determination for the single particle mass spectra, I found a few places need more information and explanation, besides the current replies from authors.

The main argument of the comments from one reviewer is about whether the separation between  $V^+$  and  $C_4H_3^+$  at  $m/z$  51Th is real or can be applied to the ambient air.

1) The raw and calibrated peaks at 51Th of single particles should be given. A few examples of single particle mass spectra around 51Th in both raw and calibrated forms will help, rather than only showing the averaged mass spectra in Fig. 5. This will answer referee's comments about whether both V and  $C_4H_3$  may exist in the ambient air, and can also demonstrate how well your algorithm may work.

### Response:

We sincerely thank the editor's suggestion. We have randomly chosen 10  $V^+$ -containing particles and 10  $C_4H_3^+$ -containing particles as examples for illustration, and plotted their raw and calibrated peaks at around  $\sim 51$ Th in our revised manuscript (Fig. 5e). The  $m/z$  of raw peaks are randomly distributed, which means the corresponding chemicals of these peaks could not be determined before the calibration. During the calibration, we tried all possible coefficients in the coefficient space, and the optimal coefficient was obtained using our value function. In other words, the calibrated  $m/z$  value of peak around 51 Th is determined by assessing the whole spectrum. We revised our manuscript in Lines 230-233 as:

*For instance, we randomly chose 10  $V^+$ -containing and 10  $C_4H_3^+$ -containing particles, with single-particle mass spectra (raw and calibrated) provided (Fig. S4). The peaks, both raw and calibrated, at  $\sim 51$  Th in these particles are illustrated in Fig. 5e. The corresponding species ( $V^+$  or  $C_4H_3^+$ ) of these peaks can easily be determined after our calibration (Fig. 5e, Text S4).*

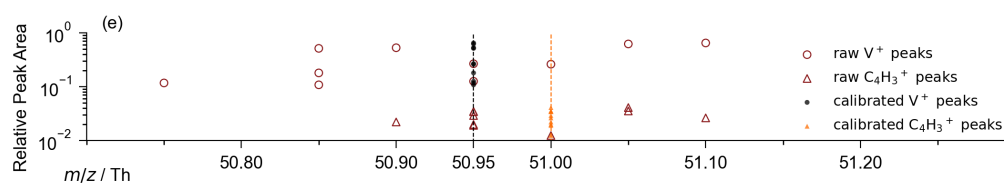

**Figure 5.** (e) Raw and calibrated peaks around 51 Th of 20  $V^+$ -containing and 10  $C_4H_3^+$ -containing particles.

In addition, we provided the raw and calibrated single-particle spectra of the examples in Figure S4.

We believe the modification could help the reader's understanding of our calibration of the mass spectrum of single particles.

2) The authors should more explicitly explain why 50.95 should be assigned with V. The argument is about whether this has been proved in the laboratory. By tracking the literatures, I can see the original validation for V 50.95 is from the table 2. Du et al. has published the lab work where they generated particles with V mixing with other substances in single particle, and they found both peaks of 51 and 50.95 in single particle. I wouldn't think the authors need to repeat this lab work, but a full explanation (with clear reference supporting your results) should be given to explanation what 51 and 50.95 should be assigned with. This should come with the single particle mass spectra above to demonstrate how both compositions may separate or mix with each other in the ambient air.

**Response:**

We sincerely thank the editor's comment. When assigning peaks with the corresponding species, we first compare the calibrated mass to the exact mass. For instance, given the 500-ppm accuracy after calibration,  $m/z$  in the range of 50.925-50.975 Th are labeled 50.95 Th. Therefore, when assigning the corresponding chemicals of peaks at 50.95 Th, all possibilities whose exact  $m/z$  at 50.925-50.975 Th should be checked. We have calculated all possible species based on the mass of atoms and electrons. Here, we listed all species at ~50.95 Th in Table S2, and compared our result with the NIST database and the PubChem database.<sup>1,2</sup> Since all of the species are obtained by theoretical calculation, we only consider the species that can be found in the two databases.

**Table S2.** Possible ions around 50.95 Th under 500-ppm accuracy.

| Ion                           | Exact $m/z$ (Th) | NIST      | PubChem   |
|-------------------------------|------------------|-----------|-----------|
| V <sup>+</sup>                | 50.9434          | Have data | Have data |
| SF <sup>+</sup>               | 50.9699          | Have data | Have data |
| ClO <sup>+</sup>              | 50.9632          | No data   | No data   |
| TiH <sub>3</sub> <sup>+</sup> | 50.9709          | No data   | No data   |

However, for the remaining candidates, we should further check their stability and existence in the atmosphere. For instance, SF<sup>+</sup> is unstable and rarely encountered in the atmosphere. Instead, the existence of V<sup>+</sup> in atmospheric aerosols has been widely reported.<sup>3-8</sup> Therefore, we consider V<sup>+</sup> to be the corresponding species at 50.95 Th. Additionally, most 50.95-Th-containing spectra also contain peaks at 66.95 Th (the exact mass of VO<sup>+</sup>), indicating the assignment of V<sup>+</sup> at 50.95 Th is self-consistent.

We applied the same method when assigning the possible species at 51.00 Th. Possible ions around 51.00 Th under 500-ppm accuracy (50.925-50.975 Th) are listed below (Table S3).

**Table S3.** Possible ions around 51.00 Th under 500-ppm accuracy.

| Ion                                         | Exact $m/z$ (Th) | NIST      | PubChem   |
|---------------------------------------------|------------------|-----------|-----------|
| AlC <sub>2</sub> <sup>+</sup>               | 50.9810          | No data   | No data   |
| CBSi <sup>+</sup>                           | 50.9857          | No data   | No data   |
| ClH <sub>2</sub> N <sup>+</sup>             | 50.9870          | Have data | No data   |
| LiOSi <sup>+</sup>                          | 50.9872          | No data   | No data   |
| FO <sub>2</sub> <sup>+</sup>                | 50.9877          | No data   | No data   |
| H <sub>3</sub> OS <sup>+</sup>              | 50.9900          | No data   | Have data |
| H <sub>3</sub> Mg <sub>2</sub> <sup>+</sup> | 50.9930          | No data   | No data   |

|                                            |         |           |           |
|--------------------------------------------|---------|-----------|-----------|
| CH <sub>4</sub> Cl <sup>+</sup>            | 50.9996 | No data   | Have data |
| CHF <sub>2</sub> <sup>+</sup>              | 51.0041 | Have data | Have data |
| CLiO <sub>2</sub> <sup>+</sup>             | 51.0053 | No data   | No data   |
| C <sub>3</sub> HN <sup>+</sup>             | 51.0104 | Have data | Have data |
| H <sub>3</sub> NS <sup>+</sup>             | 51.0137 | No data   | No data   |
| C <sub>4</sub> H <sub>3</sub> <sup>+</sup> | 51.0229 | Have data | Have data |

The existence of most of these species has not been reported in previous studies. Elements in some species are in trace amounts in the atmosphere, including B, F, and Li. Species like ClH<sub>2</sub>N<sup>+</sup> have more than one heteroatom, which makes the occurrence of these species in the mass spectra lower than simple species that contain only C, H, and N. For these reasons, we only consider C<sub>4</sub>H<sub>3</sub><sup>+</sup> and C<sub>3</sub>NH<sup>+</sup> as candidates at 51.00 Th. As shown in Figure 5 and Figure S4, spectra containing 51.00 Th also contain peaks at 12.00 Th (C<sup>+</sup>), 36.00 Th (C<sub>3</sub><sup>+</sup>), 37.00 Th (C<sub>3</sub>H<sup>+</sup>), 38.00 Th (C<sub>3</sub>H<sub>2</sub><sup>+</sup>), 39.00 Th (C<sub>3</sub>H<sub>3</sub><sup>+</sup>), 43.05 Th (C<sub>3</sub>H<sub>7</sub><sup>+</sup>), and 50.00 Th (C<sub>4</sub>H<sub>2</sub><sup>+</sup>). The combination of all these species is consistent with the distribution pattern of C<sub>m</sub>H<sub>n</sub><sup>+</sup> fragments. Therefore, we assign 51.00 Th as C<sub>4</sub>H<sub>3</sub><sup>+</sup> in our study. Further, the existence of C<sub>4</sub>H<sub>3</sub><sup>+</sup> has been reported in previous studies (including both lab and ambient-measurement studies).<sup>4,5,9,10</sup>

In the revised manuscript, we have added a detailed explanation (Text S4) about determining the corresponding chemical species at 50.95 Th and 51.00 Th, which we think could help the reader's comprehension.

## Reference

- (1) Linstrom, P. J.; Mallard, W. G.; Eds., NIST Chemistry WebBook, NIST Standard Reference Database Number 69, National Institute of Standards and Technology, Gaithersburg MD, 20899, <https://doi.org/10.18434/T4D303>, 2024.
- (2) Kim, S.; Chen, J.; Cheng, T.; Gindulyte, A.; He, J.; He, S.; Li, Q.; Shoemaker, B. A.; Thiessen, P. A.; Yu, B.; Zaslavsky, L.; Zhang, J.; & Bolton, E. E. PubChem 2023 update. *Nucleic Acids Res.*, 51(D1), D1373–D1380. <https://doi.org/10.1093/nar/gkac956>, 2023.
- (3) Ault, A. P.; Gaston, C. J.; Wang, Y.; Dominguez, G.; Thiemens, M. H.; Prather, K. A. Characterization of the Single Particle Mixing State of Individual Ship Plume Events Measured at the Port of Los Angeles. *Environ. Sci. Technol.* **2010**, 44 (6), 1954–1961. <https://doi.org/10.1021/es902985h>.
- (4) Zhai, J.; Yu, G.; Zhang, J.; Shi, S.; Yuan, Y.; Jiang, S.; Xing, C.; Cai, B.; Zeng, Y.; Wang, Y.; Zhang, A.; Zhang, Y.; Fu, T.-M.; Zhu, L.; Shen, H.; Ye, J.; Wang, C.; Tao, S.; Li, M.; Zhang, Y.; Yang, X. Impact of Ship Emissions on Air Quality in the Greater Bay Area in China under the Latest Global Marine Fuel Regulation. *Environ. Sci. Technol.* **2023**, 57 (33), 12341–12350. <https://doi.org/10.1021/acs.est.3c03950>.
- (5) Wang, G.; Ruser, H.; Schade, J.; Passig, J.; Adam, T.; Dollinger, G.; Zimmermann, R. 1D-CNN Network Based Real-Time Aerosol Particle Classification With Single-Particle Mass Spectrometry. *IEEE Sens. Lett.* **2023**, 7 (11), 1–4. <https://doi.org/10.1109/LSENS.2023.3315554>.
- (6) Passig, J.; Schade, J.; Rosewig, E. I.; Irsig, R.; Kröger-Badge, T.; Czech, H.; Sklorz, M.; Streibel, T.; Li, L.; Li, X.; Zhou, Z.; Fallgren, H.; Moldanova, J.; Zimmermann, R. Resonance-Enhanced Detection of Metals in Aerosols Using Single-Particle Mass Spectrometry. *Atmos. Chem. Phys.* **2020**, 20 (12), 7139–7152. <https://doi.org/10.5194/acp-20-7139-2020>.

- (7) Passig, J.; Schade, J.; Irsig, R.; Li, L.; Li, X.; Zhou, Z.; Adam, T.; Zimmermann, R. Detection of Ship Plumes from Residual Fuel Operation in Emission Control Areas Using Single-Particle Mass Spectrometry. *Atmos. Meas. Tech.* **2021**, *14* (6), 4171–4185. <https://doi.org/10.5194/amt-14-4171-2021>.
- (8) Anders, L.; Schade, J.; Rosewig, E. I.; Kröger-Badge, T.; Irsig, R.; Jeong, S.; Bendl, J.; Saraji-Bozorgzad, M. R.; Huang, J.-H.; Zhang, F.-Y.; Wang, C. C.; Adam, T.; Sklorz, M.; Etzien, U.; Buchholz, B.; Czech, H.; Streibel, T.; Passig, J.; Zimmermann, R. Detection of Ship Emissions from Distillate Fuel Operation via Single-Particle Profiling of Polycyclic Aromatic Hydrocarbons. *Environ. Sci.: Atmos.* **2023**, *3* (8), 1134–1144. <https://doi.org/10.1039/D3EA00056G>.
- (9) Du, X.; Xie, Q.; Huang, Q.; Li, X.; Yang, J.; Hou, Z.; Wang, J.; Li, X.; Zhou, Z.; Huang, Z.; Gao, W.; Li, L. Development and Characterization of a High-Performance Single-Particle Aerosol Mass Spectrometer (HP-SPAMS). *Atmos. Meas. Tech.* **2024**, *17* (3), 1037–1050. <https://doi.org/10.5194/amt-17-1037-2024>.
- (10) Xiao, Q.; Li, M.; Liu, H.; Fu, M.; Deng, F.; Lv, Z.; Man, H.; Jin, X.; Liu, S.; He, K. Characteristics of Marine Shipping Emissions at Berth: Profiles for Particulate Matter and Volatile Organic Compounds. *Atmos. Chem. Phys.* **2018**, *18* (13), 9527–9545. <https://doi.org/10.5194/acp-18-9527-2018>.
